# Supplementary material for: Lateral thinking in syndromic congenital cardiovascular disease
Source: PubMed Central journal article supplement (PMC10184679; doi:10.1242/dmm.049735), 2023-05-03
Supplement: dmm-16-049735-s1.pdf [file dmm-16-049735-s1.pdf]

## Supplementary information

Steps to generate a list of OMIM searches, comparison table and Excel sheet with results.

- 1) Make an account on <https://www.overleaf.com/> and upload the code below in a file.
- 2) Make a list in Excel with the diseases of interest - make a column with OMIM number (see example attached "list.csv").
- 3) Save this list as .csv (name it "list" for easiest use to preserve the current code).
- 4) Upload the table in overleaf and it will pop up in the compiled document.
- 5) Copy-paste the string on page 3 from the overleaf recompiled output in a browser.

### Example Overleaf interface:

The screenshot displays the Overleaf web interface. On the left, the file explorer shows a project named 'OMIMsupplement' with files 'list.csv' and 'OMIMsearch.tex'. The main editor shows LaTeX source code for a document class, packages, and a section titled 'Directions'. The code includes instructions for creating an OMIM search list and a table. The right-hand side shows the compiled document preview, which contains a list of OMIM numbers and a table structure. A pink box highlights the 'Recompile' button in the top right corner of the interface, and a pink arrow points to it. The preview area also contains a pink box around the text 'Copy and search this in searchbar - remove the last "and symbol!"' and a list of OMIM numbers.

### **Code to upload in overleaf:**

```
\documentclass[12pt, letterpaper]{article}
\usepackage[document]{ragged2e}
\usepackage{csvsimple} %for the .csv file reader
\usepackage[utf8]{inputenc} %for the fonts
\usepackage[T1]{fontenc}
\usepackage{helvet}

\begin{document}

\section*{Directions}
This will help you to make a list of OMIM searches, a table comparing them
and an Excel sheet with results.\\~\\
1) Make an account on https://www.overleaf.com/ and upload this code
(OMIMsearch.tex file).\\~\\
2) Make a list in Excel with the diseases of interest - make a column with
OMIM number (see example attached
"list.csv").\\~\\
3) Save this list as .csv (name it "list" for easiest use to preserve the
current code).\\~\\
4) Upload the table in overleaf and it will pop up in the compiled
document.\\~\\
5) Copy-paste the string on page 3.

\newpage

%TABLE
\section*{The table as in Excel}
\csvautotabular{list.csv} %choose your file - will show the table
\newline
~
\newpage

%COMPARISON TABLE
\section*{Copy and paste this in a browser}\\~\\

\csvreader
[before first line = {https://omim.org/clinicalSynopsis/table?\\},
after line = \\]
{list.csv}{OMIM=\OMIM}
{mimNumber=\OMIM\&}

\end{document}
```

**Example PDF output once run in overleaf:**

## Directions

This will help you to make a list of OMIM searches, a table comparing them and an Excel sheet with results.

- 1) Make an account on <https://www.overleaf.com/> and upload this code (OMIMsearch.tex file).
- 2) Make a list in Excel with the diseases of interest - make a column with OMIM number (see example attached "list.csv").
- 3) Save this list as .csv (name it "list" for easiest use to preserve the current code).
- 4) Upload the table in overleaf and it will pop up in the compiled document.
- 5) Copy-paste the string on page 3.

## The table as in excel

| OMIM   |
|--------|
| 600594 |
| 608545 |
| 245650 |
| 601362 |
| 263210 |
| 112430 |
| 610140 |
| 140450 |
| 274000 |
| 194350 |
| 102500 |
| 142900 |
| 236700 |
| 604381 |
| 105650 |
| 122880 |
| 100300 |
| 208540 |
| 194050 |
| 249000 |
| 214800 |
| 188400 |
| 313850 |
| 150250 |
| 607323 |
| 147750 |
| 147920 |
| 605432 |
| 227650 |
| 308050 |
| 147891 |

## Copy and paste this in a browser

[https://omim.org/clinicalSynopsis/table?  
mimNumber=600594&  
mimNumber=608545&  
mimNumber=245650&  
mimNumber=601362&  
mimNumber=263210&  
mimNumber=112430&  
mimNumber=610140&  
mimNumber=140450&  
mimNumber=274000&  
mimNumber=194350&  
mimNumber=102500&  
mimNumber=142900&  
mimNumber=236700&  
mimNumber=604381&  
mimNumber=105650&  
mimNumber=122880&  
mimNumber=100300&  
mimNumber=208540&  
mimNumber=194050&  
mimNumber=249000&  
mimNumber=214800&  
mimNumber=188400&  
mimNumber=313850&  
mimNumber=150250&  
mimNumber=607323&  
mimNumber=147750&  
mimNumber=147920&  
mimNumber=605432&  
mimNumber=227650&  
mimNumber=308050&  
mimNumber=147891](https://omim.org/clinicalSynopsis/table?mimNumber=600594&mimNumber=608545&mimNumber=245650&mimNumber=601362&mimNumber=263210&mimNumber=112430&mimNumber=610140&mimNumber=140450&mimNumber=274000&mimNumber=194350&mimNumber=102500&mimNumber=142900&mimNumber=236700&mimNumber=604381&mimNumber=105650&mimNumber=122880&mimNumber=100300&mimNumber=208540&mimNumber=194050&mimNumber=249000&mimNumber=214800&mimNumber=188400&mimNumber=313850&mimNumber=150250&mimNumber=607323&mimNumber=147750&mimNumber=147920&mimNumber=605432&mimNumber=227650&mimNumber=308050&mimNumber=147891)
